# Supplementary material for: Synthesis of Cu2ZnxSnySe1+x+2y nanocrystals with wurtzite-derived structure
Source: Royal Society of Chemistry journal article supplement (doi:10.1039/c2ra21293e), 2012-01-01
Supplement: c2ra21293e.pdf [file c2ra21293e.pdf]

## Supporting Information

# Synthesis of $\text{Cu}_2\text{Zn}_x\text{Sn}_y\text{Se}_{1+x+2y}$ Nanocrystals with Wurtzite-Derived Structure

Xianzhong Lin\*, Jaison Kavalakkatt, Kai Kornhuber, Daniel Abou-Ras, Susan Schorr,  
Martha Ch. Lux-Steiner, and Ahmed Ennaoui\*

Helmholtz-Zentrum Berlin für Materialien und Energie GmbH

Hahn-Meitner Platz 1, 14109 Berlin-Germany.

## Simulation diffraction pattern of kesterite type, wurtzite type and wurtz-stannite type CZTSe

### Crystal structures

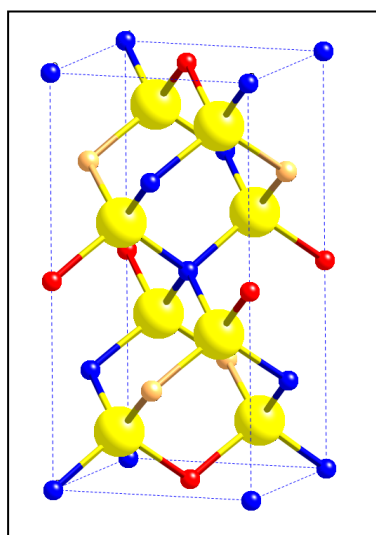

kesterite type structure

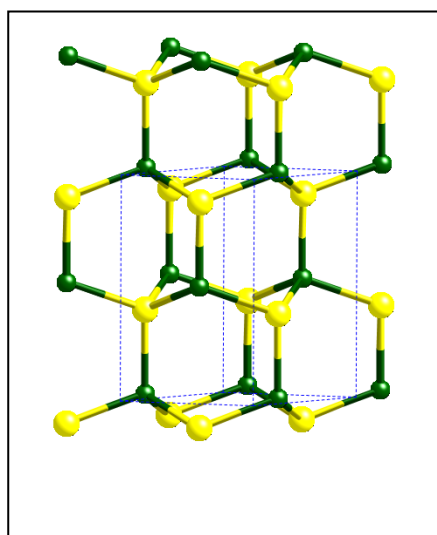

wurtzite type structure

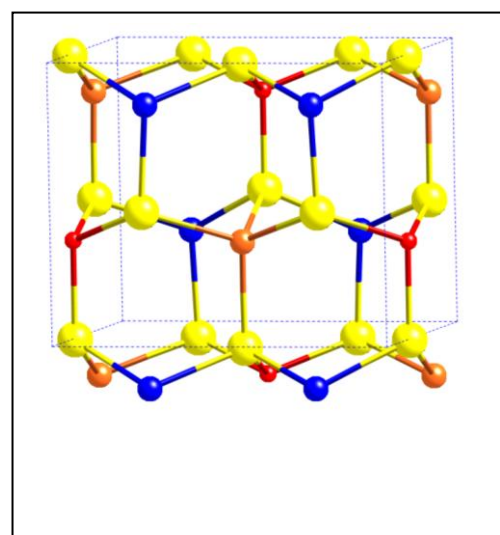

wurtz-stannite type structure

Figure. S1 Schematic representation of the unit cells of kesterite type, wurtzite type and wurtz-stannite type CZTSe (blue – Cu; orange – Zn; red – Sn; yellow – Se; green – random distribution of Cu, Zn and Sn)

### Crystal structure data

| Molecular formula            | structure type | crystal system | space group  |
|------------------------------|----------------|----------------|--------------|
| $\text{Cu}_2\text{ZnSnSe}_4$ | kesterite      | tetragonal     | $\bar{1}42d$ |

|                              |                |              |          |
|------------------------------|----------------|--------------|----------|
| $\text{Cu}_2\text{ZnSnSe}_4$ | wurtzite       | hexagonal    | $P6_3mc$ |
| $\text{Cu}_2\text{ZnSnSe}_4$ | wurtz-stannite | orthorhombic | $Pmn2_1$ |

Table S0: Atomic coordinates related to the kesterite type structure (8g is an (x,y,z) position, nevertheless x and y are very similar)

| Atom | Wyckhoff position | x      | y      | z      |
|------|-------------------|--------|--------|--------|
| Cu   | 2a                | 0      | 0      | 0      |
| Cu   | 2c                | 0      | 1/2    | 1/4    |
| Zn   | 2d                | 1/2    | 0      | 1/4    |
| Sn   | 2b                | 1/2    | 1/2    | 1      |
| Se   | 8g                | 0.2587 | 0.2587 | 0.3714 |

Table S1: Atomic coordinates related to the wurtzite type structure (2b is the (1/3,2/3,z) position)

| Atom | Wyckhoff position | x   | y   | z    |
|------|-------------------|-----|-----|------|
| Se   | 2b                | 1/3 | 2/3 | 3/8  |
| Zn   | 2b                | 1/3 | 2/3 | 1.00 |
| Cu   | 2b                | 1/3 | 2/3 | 1.00 |
| Sn   | 2b                | 1/3 | 2/3 | 1.00 |

Chen et al.<sup>1</sup> have shown that the kesterite structure of CZTSe can be derived from zinc-blende type ZnSe by substituting  $\text{Zn}^{2+}$  atoms with  $\text{Cu}^+$ ,  $\text{Zn}^{2+}$  and  $\text{Sn}^{4+}$ . Hereby we simulated diffraction pattern from the wurtzite ZnSe by replacing  $\text{Zn}^{2+}$  atomic position with  $\text{Cu}^+$ ,  $\text{Zn}^{2+}$  and  $\text{Sn}^{4+}$ . The atomic ratio of Cu:Zn:Sn is 50:25:25.

Table S2: Atomic coordinates related to the wurtz-stannite type structure (4b is the general position (x,y,z); 2a is the position (0,y,z)). The structure is based on  $\text{Cu}_2\text{ZnSiS}_4$  (ICSD-261267). The given values result from the Rietveld analysis.

| Atom | Wyckhoff position | x      | y       | z      |
|------|-------------------|--------|---------|--------|
| Cu   | 4b                | 0.7524 | 0.6780  | 0.1790 |
| Zn   | 2a                | 0.00   | 0.8448  | 2/3    |
| Sn   | 2a                | 0.00   | 0.1773  | 0.1697 |
| Se   | 2a                | 0.00   | 0.86280 | 0.0635 |
| Se   | 2a                | 0.00   | 0.1913  | 0.5144 |
| Se   | 4b                | 0.7290 | 0.6645  | 0.5508 |

## Reference

- (1) S. Chen, A. Walsh, Y. Luo, J.-H. Yang, X. Gong, S.-H. Wei, *Phys. Rev B*, 2010, **82**, 1.
